# Supplementary material for: Decade of Carbapenemase-Producing Enterobacterales in New Caledonia: Integrative Surveillance Though Genomic, Phenotypic and Clinical approaches
Source: Research Square preprint supplement (doi:10.21203/rs.3.rs-5067243/v1), 2024-12-09
Supplement: Supplementary file 1 [file a4a1abcc420d062eaa6707dc.xlsx]

## Sheet: feuil1
	quast														checkM													mlst									TYGS									FastANI
Assembly	# contigs (>= 0 bp)	# contigs (>= 1000 bp)	Total length (>= 0 bp)	Total length (>= 1000 bp)	# contigs	Largest contig	Total length	GC (%)	N50	N90	auN	L50	L90	# N's per 100 kbp	Marker lineage	genomes	markers	markers sets	0	1	2	3	4	5+	Completness	Contamination	Strain heterogeneity										Specie	Subject strain	dDDH (d0, in %)	C.I. (d0, in %)	dDDH (d4, in %)	C.I. (d4, in %)	dDDH (d6, in %)	C.I. (d6, in %)	G+C content difference (in %)	Reference Genome	Best ANI Value (%)	Count of Bidirectional Fragment Mappings	Total Query Fragments
CLIN01	116	100	4246036	4025282	67	315260	4500797	52.37	148858	47416	162467.6	11	30	17.42	Escherichia	27	1212	320	5	1201	6	0	0	0	99.02	0.53	0	ecoli	744	adk(10)	fumC(11)	gyrB(135)	icd(8)	mdh(8)	purA(8)	recA(2)	Shigella boydii	Shigella boydii ATCC 8700	70.3	[66.4 - 74.0]	86.3	[83.7 - 88.6]	75.5	[72.0 - 78.7]	0.24
CLIN02	72	49	5398964	5200386	62	970164	5536793	57.30	322101	93266	420730.0	6	16	1.59	Klebsiella	29	1359	348	2	1355	2	0	0	0	99.9	0.31	0	kpneumoniae	16	gapA(2)	infB(1)	mdh(2)	pgi(1)	phoE(4)	rpoB(4)	tonB(4)	Klebsiella pneumoniae subsp. Ozaenae	Klebsiella pneumoniae subsp. ozaenae ATCC 11296	73.7	[69.7 - 77.3]	93.8	[92.0 - 95.3]	79.7	[76.3 - 82.8]	0.04
CLIN03	77	54	5445915	5252259	67	746940	5582821	57.25	369897	93048	387604.7	6	16	1.83	Klebsiella	29	1359	348	2	1354	3	0	0	0	99.9	0.35	0	kpneumoniae	16	gapA(2)	infB(1)	mdh(2)	pgi(1)	phoE(4)	rpoB(4)	tonB(4)	Klebsiella pneumoniae subsp. Ozaenae	Klebsiella pneumoniae subsp. ozaenae ATCC 11296	72.9	[68.9 - 76.5]	93.9	[92.1 - 95.3]	79	[75.6 - 82.1]	0.01
CLIN04	87	69	5133603	4961698	83	596596	5462482	57.20	363216	59364	318418.7	6	21	3.19	Klebsiella	29	1359	348	1	1354	4	0	0	0	99.99	0.43	0	kpneumoniae	20	gapA(2)	infB(3)	mdh(1)	pgi(1)	phoE(4)	rpoB(4)	tonB(4)	Klebsiella pneumoniae	Klebsiella pneumoniae DSM 30104	80.5	[76.6 - 83.9]	93.8	[92.0 - 95.2]	85.6	[82.5 - 88.3]	0.18
CLIN05	69	64	4246036	4025282	67	315260	4500797	52.37	148858	47416	162467.6	11	30	17.42	Citrobacter	8	1566	347	71	1489	6	0	0	0	95.36	0.45	0	cfreundii	98	aspC(54)	clpX(55)	fadD(60)	mdh(52)	arcA(7)	dnaG(6)	lysP(11)	Citrobacter freundii	Citrobacter freundii NBRC 12681	82.6	[78.7 - 85.8]	88.4	[85.9 - 90.5]	86.5	[83.4 - 89.0]	0.71
CLIN06	123	100	5185020	4775883	114	276200	5592036	58.97	132993	34378	140438.9	15	43	5.88	Serratia	13	985	293	3	969	11	2	0	0	99.92	1.73	5.88	-	-								Serratia montpellierensis	Serratia montpellierensis PsyLou2A	74.1	[70.1 - 77.7]	68.2	[65.2 - 71.0]	75.6	[72.1 - 78.7]	0.61
CLIN07	160	134	4787245	3880699	152	298329	5333696	55.68	75816	23566	92783.4	23	69	6.47	Enterobacter	13	1338	370	6	1319	13	0	0	0	99.21	1.51	0	ecloacae	414	dnaA(136)	fusA(99)	gyrB(153)	leuS(160)	pyrG(140)	rplB(12)	rpoB(92)	Enterobacter chengduensis	Enterobacter chengduensis WCHECl-C4	86.6	[83.0 - 89.6]	99.1	[98.6 - 99.4]	91.4	[88.8 - 93.4]	0.06	E. chengduensis; GCF_001984825	99.7402	1533	1693
CLIN08	151	80	5421113	5312617	146	239022	5419094	59.16	90736	21579	104974.9	19	61	0.00	Serratia	13	985	293	3	970	12	0	0	0	99.92	1.66	0	-	-								Serratia montpellierensis	Serratia montpellierensis PsyLou2A	76.8	[72.8 - 80.4]	68.1	[65.2 - 71.0]	77.9	[74.4 - 81.0]	0.41
CLIN09	102	81	5238629	4983137	96	515126	5578704	57.22	338515	44713	305812.7	7	22	5.81	Klebsiella	29	1359	348	1	1354	4	0	0	0	99.99	0.36	0	kpneumoniae	20	gapA(2)	infB(3)	mdh(1)	pgi(1)	phoE(4)	rpoB(4)	tonB(4)	Klebsiella pneumoniae	Klebsiella pneumoniae DSM 30104	79.5	[75.5 - 82.9]	93.8	[91.9 - 95.2]	84.8	[81.6 - 87.5]	0.2
CLIN100	82	34	5185956	5100811	77	759163	5183778	55.61	450331	48874	389904.7	5	19	5.79	Enterobacter	13	1338	370	7	1322	7	2	0	0	98.67	0.8	0	ecloacae	3040	dnaA(305)	fusA(106)	gyrB(466)	leuS(237)	pyrG(467)	rplB(12)	rpoB(18)	Enterobacter rongchengensis	Enterobacter rongchengensis 170250	79.5	[75.5 - 82.9]	93.2	[91.3 - 94.7]	84.7	[81.5 - 87.4]	0.57	E. Genomospecies_4; GCF_000958285.1	98.9873	1465	1691
CLIN101	87	34	5292442	5212804	83	899847	5290815	51.66	231189	67147	364466.4	6	22	0.00	Citrobacter	8	1566	347	1	1551	12	2	0	0	99.97	1.55	11.11	cfreundii	98	aspC(54)	clpX(55)	fadD(60)	mdh(52)	arcA(7)	dnaG(6)	lysP(11)	Citrobacter freundii	Citrobacter freundii NBRC 12681	79	[75.0 - 82.5]	87.9	[85.4 - 90.0]	83.4	[80.1 - 86.2]	0
CLIN102	71	29	4923125	4859837	66	670662	4921013	51.78	231189	71950	326706.6	6	19	0.00	Citrobacter	8	1566	347	2	1556	7	1	0	0	99.95	0.66	0	cfreundii	98	aspC(54)	clpX(55)	fadD(60)	mdh(52)	arcA(7)	dnaG(6)	lysP(11)	Citrobacter freundii	Citrobacter freundii NBRC 12681	84.4	[80.6 - 87.5]	88.2	[85.7 - 90.3]	87.9	[84.9 - 90.3]	0.12
CLIN103	84	37	5294216	5228183	76	900622	5290861	51.68	231145	58924	361854.8	6	24	1.89	Citrobacter	8	1566	347	1	1550	13	2	0	0	99.97	1.58	10.53	cfreundii	98	aspC(54)	clpX(55)	fadD(60)	mdh(52)	arcA(7)	dnaG(6)	lysP(11)	Citrobacter freundii	Citrobacter freundii NBRC 12681	78.9	[75.0 - 82.4]	87.9	[85.4 - 90.0]	83.3	[80.1 - 86.2]	0.02
CLIN104	77	36	5263919	5203909	71	899803	5261388	51.68	231127	56067	367192.8	6	22	1.90	Citrobacter	8	1566	347	1	1553	10	2	0	0	99.97	1.43	0	cfreundii	98	aspC(54)	clpX(55)	fadD(60)	mdh(52)	arcA(7)	dnaG(6)	lysP(11)	Citrobacter freundii	Citrobacter freundii NBRC 12681	79.5	[75.5 - 82.9]	87.9	[85.4 - 90.0]	83.8	[80.5 - 86.6]	0.02
CLIN105	73	39	5180518	5145898	72	625760	5180146	50.53	166197	53885	272994.4	8	26	0.00	Escherichia	27	1212	320	3	1197	12	0	0	0	99.64	1.23	16.67	ecoli	315	adk(4)	fumC(26)	gyrB(2)	icd(25)	mdh(5)	purA(8)	recA(19)	Escherichia coli	Escherichia coli DSM 30083	73.9	[69.9 - 77.5]	75.1	[72.1 - 77.9]	76.7	[73.3 - 79.9]	0.12
CLIN106	68	39	5084217	5051000	65	405490	5082941	55.37	244631	63183	240096.9	8	24	1.97	Enterobacter	13	1338	370	12	1314	12	0	0	0	99.07	1.33	0	ecloacae	90	dnaA(58)	fusA(37)	gyrB(4)	leuS(6)	pyrG(42)	rplB(4)	rpoB(25)	Enterobacter hormaechei subsp. Steigerwaltii	Enterobacter hormaechei subsp. steigerwaltii DSM 16691	90.1	[86.9 - 92.6]	97.8	[96.8 - 98.4]	93.7	[91.5 - 95.4]	0.18	E. xiangfangensis; GCF_001729785.1	97.0437	1382	1665
CLIN107	95	42	5237780	5161186	90	606035	5235688	50.63	208828	43637	251012.4	8	27	5.73	Escherichia	27	1212	320	3	1202	6	1	0	0	99.64	0.71	0	ecoli	156	adk(6)	fumC(29)	gyrB(32)	icd(16)	mdh(11)	purA(8)	recA(44)	Shigella sonnei	Shigella sonnei ATCC 29930	70.5	[66.6 - 74.2]	88	[85.5 - 90.1]	75.9	[72.5 - 79.1]	0.38
CLIN108	83	35	5724955	5663757	73	608993	5720729	57.09	323634	67292	335409.4	7	19	5.24	Klebsiella	29	1359	348	6	1347	6	0	0	0	99.42	1	0	kpneumoniae	1213	gapA(2)	infB(1)	mdh(1)	pgi(1)	phoE(7)	rpoB(4)	tonB(87)	Klebsiella pneumoniae subsp. Ozaenae	Klebsiella pneumoniae subsp. ozaenae ATCC 11296	71.6	[67.7 - 75.3]	93.1	[91.2 - 94.6]	77.8	[74.3 - 80.9]	0.18
CLIN109	38	22	5243380	5229323	28	1424139	5239347	57.50	427994	94273	616654.3	4	13	5.73	Klebsiella	29	1359	348	1	1353	5	0	0	0	99.99	0.42	0	kpneumoniae	6073	gapA(3)	infB(1)	mdh(1)	pgi(1)	phoE(1)	rpoB(4)	tonB(135)	Klebsiella pneumoniae subsp. Ozaenae	Klebsiella pneumoniae subsp. ozaenae ATCC 11296	76.4	[72.5 - 80.0]	94	[92.2 - 95.4]	82.2	[78.9 - 85.1]	0.23
CLIN110	95	27	5073551	4990147	80	1252819	5067476	50.42	597215	52495	604067.0	3	15	5.92	Escherichia	27	1212	320	3	1198	10	1	0	0	99.64	1.87	0	ecoli	1385	adk(13)	fumC(40)	gyrB(93)	icd(13)	mdh(23)	purA(28)	recA(30)	Escherichia coli DSM 30083	Escherichia coli DSM 30083	79.1	[75.1 - 82.6]	87.1	[84.5 - 89.3]	83.4	[80.1 - 86.2]	0.23
CLIN111	85	31	4639675	4575137	70	929467	4633910	40.39	245462	81998	363429.5	6	17	0.00	Providencia	6	1517	302	11	1476	28	1	1	0	98.53	3.3	2.7	Prettgeri	79	fusA(15)	gyrB(42)	ileS(24)	lepA(36)	leuS(46)			Providencia hangzhouensis	Providencia hangzhouensis PR-310	90.7	[87.6 - 93.2]	93.9	[92.1 - 95.3]	93.6	[91.4 - 95.3]	0.05
CLIN113	54	26	6072650	6038732	51	1200625	6071400	56.54	341079	132792	461024.2	6	17	3.29	Klebsiella	29	1359	348	1	1345	10	3	0	0	99.99	1.39	15.79	kpneumoniae	6894	gapA(16)	infB(18)	mdh(30)	pgi(31)	phoE(645)	rpoB(22)	tonB(178)	Klebsiella variicola	Klebsiella variicola DSM 15968	85.9	[82.2 - 88.9]	92	[89.9 - 93.7]	89.7	[86.9 - 91.9]	1.02
CLIN114	51	20	4391770	4341870	48	701937	4390435	40.66	368583	83282	382757.1	5	14	20.50	Providencia	6	1517	302	17	1468	27	4	1	0	97.2	3.33	8.89	Prettgeri	-	fusA(~20)	gyrB(~23)	ileS(~31)	lepA(~28)	leuS(27)			Providencia huaxiensis	Providencia huaxiensis WCHPr000369T	71.9	[67.9 - 75.5]	54.6	[51.9 - 57.3]	70.4	[66.9 - 73.6]	0.64
CLIN115	59	30	5406820	5381781	54	627486	5404696	59.65	333781	85270	324652.3	6	19	0.00	Serratia	13	985	293	5	959	21	0	0	0	99.54	0.73	0	-	-								Serratia sarumanii	Serratia sarumanii K-M0706	87.9	[84.4 - 90.7]	89.3	[86.9 - 91.3]	90.8	[88.2 - 92.9]	0.22
CLIN116	223	83	4892674	4715328	198	261792	4882461	50.75	79398	15846	88671.4	21	69	2.05	Escherichia	27	1212	320	5	1201	6	0	0	0	99.02	0.53	0	ecoli	10	adk(10)	fumC(11)	gyrB(4)	icd(8)	mdh(8)	purA(8)	recA(2)	Shigella sonnei	Shigella sonnei ATCC 29930	69.9	[66.0 - 73.6]	86.2	[83.5 - 88.4]	75.1	[71.6 - 78.3]	0.26
CLIN117	43	20	4933765	4903345	38	1123127	4931651	55.53	506588	136849	572012.0	4	11	2.03	Enterobacter	13	1338	370	7	1326	5	0	0	0	99.56	0.62	0	ecloacae	3039	dnaA(4)	fusA(4)	gyrB(14)	leuS(120)	pyrG(92)	rplB(30)	rpoB(25)	Enterobacter hormaechei subsp. Steigerwaltii	Enterobacter hormaechei subsp. steigerwaltii DSM 16691	89.4	[86.1 - 92.0]	94	[92.2 - 95.4]	92.6	[90.3 - 94.5]	0.02	E. xiangfangensis; GCF_001729785.1	97.0564	1387	1626
CLIN118	48	24	5009951	4969651	45	1512236	5008801	55.29	535000	89717	698441.4	3	12	3.99	Enterobacter	13	1338	370	6	1324	8	0	0	0	99.63	1.16	0	ecloacae	113	dnaA(4)	fusA(22)	gyrB(68)	leuS(69)	pyrG(37)	rplB(4)	rpoB(24)	Enterobacter hormaechei subsp. Steigerwaltii	Enterobacter hormaechei subsp. steigerwaltii DSM 16691	86	[82.3 - 89.0]	90.9	[88.6 - 92.7]	89.6	[86.8 - 91.9]	0.26	E. xiangfangensis; GCF_001729785.1	97.0888	1403	1649
CLIN119	77	42	5107426	5068326	71	681323	5105016	54.72	209010	54085	260481.1	8	27	1.96	Enterobacter	13	1338	370	7	1320	11	0	0	0	99.56	1.74	0	ecloacae	254	dnaA(58)	fusA(4)	gyrB(90)	leuS(6)	pyrG(39)	rplB(4)	rpoB(59)	Enterobacter hormaechei subsp. Steigerwaltii	Enterobacter hormaechei subsp. steigerwaltii DSM 16691	79.5	[75.5 - 83.0]	91.6	[89.5 - 93.4]	84.4	[81.2 - 87.2]	0.83	E. xiangfangensis; GCF_001729785.1	97.1312	1368	1668
CLIN120	94	39	5792713	5718568	87	927198	5789785	56.72	263079	57570	351668.7	7	23	1.73	Klebsiella	29	1359	348	2	1349	8	0	0	0	99.94	0.67	12.5	kpneumoniae	307	gapA(4)	infB(1)	mdh(2)	pgi(52)	phoE(1)	rpoB(1)	tonB(7)	Klebsiella pneumoniae	Klebsiella pneumoniae ATCC 13883	78.1	[74.1 - 81.6]	93.5	[91.6 - 95.0]	83.6	[80.3 - 86.4]	0.28
CLIN121	47	23	4876033	4849596	45	739345	4875155	55.31	457812	74633	432173.2	4	14	0.00	Enterobacter	13	1338	370	8	1324	6	0	0	0	99.29	0.96	0	ecloacae	418	dnaA(53)	fusA(35)	gyrB(~154)	leuS(44)	pyrG(45)	rplB(4)	rpoB(6)	Enterobacter hormaechei subsp. Xiangfangensis	Enterobacter hormaechei subsp. xiangfangensis LMG 27195	88	[84.6 - 90.8]	93.5	[91.6 - 94.9]	91.6	[89.0 - 93.6]	0.03	E. xiangfangensis; GCF_001729785.1	99.0802	1437	1603
CLIN122	45	24	5345291	5324313	41	1087139	5343576	59.78	333979	85226	474276.5	5	15	0.00	Serratia	13	985	293	6	975	4	0	0	0	99.42	0.31	0	-	-								Serratia sarumanii	Serratia sarumanii K-M0706	88.8	[85.4 - 91.5]	89.2	[86.8 - 91.2]	91.5	[89.0 - 93.5]	0.09
CLIN124	72	44	5037165	5008385	67	1163306	5035102	54.83	168299	51030	392013.8	7	27	3.97	Enterobacter	13	1338	370	7	1320	11	0	0	0	99.56	1.74	0	ecloacae	254	dnaA(58)	fusA(4)	gyrB(90)	leuS(6)	pyrG(39)	rplB(4)	rpoB(59)	Enterobacter hormaechei subsp. Steigerwaltii	Enterobacter hormaechei subsp. steigerwaltii DSM 16691	80.7	[76.8 - 84.1]	91.6	[89.5 - 93.4]	85.5	[82.3 - 88.1]	0.72	E. xiangfangensis; GCF_001729785.1	97.1259	1363	1647
CLIN15	143	43	5269775	5112119	138	362389	5267718	54.76	184804	29014	194427.5	10	31	0.00	Enterobacter	13	1338	370	8	1318	9	3	0	0	99.29	1.82	0	ecloacae	105	dnaA(74)	fusA(20)	gyrB(20)	leuS(65)	pyrG(45)	rplB(4)	rpoB(6)	Enterobacter hormaechei subsp. Xiangfangensis	Enterobacter hormaechei subsp. xiangfangensis LMG 27195	82.8	[78.9 - 86.0]	94.5	[92.8 - 95.8]	87.6	[84.6 - 90.1]	0.52	E. xiangfangensis; GCF_001729785.1	99.1845	1442	1686
CLIN24	116	58	5496539	5410031	113	422669	5495211	57.28	173930	27794	184222.7	11	40	0.00	Klebsiella	29	1359	348	1	1349	9	0	0	0	99.99	0.71	0	kpneumoniae	24	gapA(2)	infB(1)	mdh(1)	pgi(1)	phoE(3)	rpoB(4)	tonB(2)	Klebsiella pneumoniae subsp. Ozaenae	Klebsiella pneumoniae subsp. ozaenae ATCC 11296	73.8	[69.9 - 77.5]	93.8	[92.0 - 95.3]	79.9	[76.5 - 82.9]	0.01
CLIN28	88	49	4948928	4904750	85	496064	4947858	54.97	157870	42105	233646.2	8	31	0.00	Enterobacter	13	1338	370	6	1324	8	0	0	0	99.18	1.07	0	ecloacae	104	dnaA(59)	fusA(40)	gyrB(76)	leuS(9)	pyrG(70)	rplB(6)	rpoB(6)	Enterobacter hormaechei subsp. Hoffmannii	Enterobacter hormaechei subsp. hoffmannii DSM 14563	87.2	[83.7 - 90.1]	91.9	[89.8 - 93.6]	90.7	[88.0 - 92.8]	0.37	E. hoffmannii; GCF_001729745.1	98.8234	1443	1612
CLIN29	102	53	4950619	4898651	98	484061	4949299	54.97	133040	29568	200326.8	9	36	0.00	Enterobacter	13	1338	370	6	1324	8	0	0	0	99.18	1.07	0	ecloacae	104	dnaA(59)	fusA(40)	gyrB(76)	leuS(9)	pyrG(70)	rplB(6)	rpoB(6)	Enterobacter hormaechei subsp. Hoffmannii	Enterobacter hormaechei subsp. hoffmannii DSM 14563	87.2	[83.6 - 90.1]	91.8	[89.7 - 93.5]	90.7	[88.0 - 92.8]	0.37	E. hoffmannii; GCF_001729745.1	98.8295	1437	1604
CLIN30	93	54	4931325	4879841	92	496086	4930993	54.96	140313	31074	192552.6	10	36	0.00	Enterobacter	13	1338	370	6	1324	8	0	0	0	99.18	1.07	0	ecloacae	104	dnaA(59)	fusA(40)	gyrB(76)	leuS(9)	pyrG(70)	rplB(6)	rpoB(6)	Enterobacter hormaechei subsp. Hoffmannii	Enterobacter hormaechei subsp. hoffmannii DSM 14563	87.1	[83.5 - 90.0]	91.9	[89.8 - 93.6]	90.6	[87.9 - 92.7]	0.38	E. hoffmannii; GCF_001729745.1	98.8487	1433	1601
CLIN31	106	52	5628361	5563626	97	390865	5624465	57.28	203162	36656	192612.9	11	35	0.00	Klebsiella	29	1359	348	2	1352	5	0	0	0	99.9	0.41	0	kpneumoniae	16	gapA(2)	infB(1)	mdh(2)	pgi(1)	phoE(4)	rpoB(4)	tonB(4)	Klebsiella quasipneumoniae subsp. Similipneumoniae	Klebsiella quasipneumoniae subsp. similipneumoniae 07A044	80.2	[76.2 - 83.6]	54.7	[51.9 - 57.4]	77.3	[73.8 - 80.4]	0.93
CLIN32	73	33	4887818	4820502	70	744215	4886454	51.92	208617	68847	316245.0	6	21	0.00	Citrobacter	8	1566	347	2	1556	7	1	0	0	99.95	0.66	0	cfreundii	98	aspC(54)	clpX(55)	fadD(60)	mdh(52)	arcA(7)	dnaG(6)	lysP(11)	Citrobacter freundii	Citrobacter freundii NBRC 12681	85	[81.2 - 88.1]	88.2	[85.7 - 90.3]	88.4	[85.5 - 90.8]	0.26
CLIN33	88	46	4963132	4917714	83	490579	4961201	54.94	196658	43083	230096.7	8	29	0.00	Enterobacter	13	1338	370	6	1324	8	0	0	0	99.18	1.07	0	ecloacae	104	dnaA(59)	fusA(40)	gyrB(76)	leuS(9)	pyrG(70)	rplB(6)	rpoB(6)	Enterobacter hormaechei subsp. Hoffmannii	Enterobacter hormaechei subsp. hoffmannii DSM 14563	87	[83.4 - 89.9]	91.9	[89.8 - 93.6]	90.5	[87.8 - 92.6]	0.4	E. hoffmannii; GCF_001729745.1	98.8067	1444	1616
CLIN34	90	52	4950303	4907737	88	389263	4949544	54.96	202579	38516	184579.9	9	35	0.00	Enterobacter	13	1338	370	6	1324	8	0	0	0	99.18	1.07	0	ecloacae	104	dnaA(59)	fusA(40)	gyrB(76)	leuS(9)	pyrG(70)	rplB(6)	rpoB(6)	Enterobacter hormaechei subsp. Hoffmannii	Enterobacter hormaechei subsp. hoffmannii DSM 14563	87.2	[83.6 - 90.0]	91.9	[89.8 - 93.6]	90.7	[88.0 - 92.8]	0.38	E. hoffmannii; GCF_001729745.1	98.8408	1437	1611
CLIN35	110	52	5609871	5534773	105	363533	5607741	57.27	173912	33751	177259.5	12	35	0.00	Klebsiella	29	1359	348	2	1353	4	0	0	0	99.9	0.64	0	kpneumoniae	16	gapA(2)	infB(1)	mdh(2)	pgi(1)	phoE(4)	rpoB(4)	tonB(4)	Klebsiella quasipneumoniae subsp. Similipneumoniae	Klebsiella quasipneumoniae subsp. similipneumoniae 07A044	80.5	[76.5 - 83.9]	54.7	[51.9 - 57.3]	77.5	[74.1 - 80.6]	0.94
CLIN37	99	55	4952922	4892556	99	369350	4952922	54.97	133466	29324	162973.9	11	38	0.00	Enterobacter	13	1338	370	6	1324	8	0	0	0	99.18	1.07	0	ecloacae	104	dnaA(59)	fusA(40)	gyrB(76)	leuS(9)	pyrG(70)	rplB(6)	rpoB(6)	Enterobacter hormaechei subsp. Hoffmannii	Enterobacter hormaechei subsp. hoffmannii DSM 14563	87.2	[83.6 - 90.0]	91.8	[89.7 - 93.5]	90.6	[88.0 - 92.8]	0.37	E. hoffmannii; GCF_001729745.1	98.851	1438	1608
CLIN39	43	29	5115722	5103960	39	796692	5114074	60.02	358019	90549	374136.9	5	15	0.00	Serratia	13	985	293	6	975	4	0	0	0	99.75	0.37	0	-	-								Serratia sarumanii	Serratia sarumanii K-M0706	98	[96.7 - 98.8]	99.9	[99.8 - 99.9]	99.1	[98.4 - 99.4]	0.16
CLIN44	38	22	5118396	5103068	36	920077	5117666	60.01	379664	119725	475829.8	4	13	0.00	Serratia	13	985	293	7	974	4	0	0	0	99.74	0.37	0	-	-								Serratia sarumanii	Serratia sarumanii K-M0706	98	[96.7 - 98.8]	99.9	[99.8 - 100.0]	99.1	[98.4 - 99.4]	0.15
CLIN45	43	26	5117031	5100569	40	1136530	5115646	60.02	271848	110913	425751.0	6	17	0.00	Serratia	13	985	293	7	974	4	0	0	0	99.74	0.37	0	-	-								Serratia sarumanii	Serratia sarumanii K-M0706	98	[96.7 - 98.8]	99.9	[99.9 - 100.0]	99.1	[98.4 - 99.4]	0.16
CLIN46	40	26	5155514	5138649	38	1174652	5154531	59.94	292107	99452	488955.7	5	16	0.00	Serratia	13	985	293	5	976	4	0	0	0	99.86	0.37	0	-	-								Serratia sarumanii	Serratia sarumanii K-M0706	97.6	[96.2 - 98.5]	100	[99.9 - 100.0]	98.9	[98.1 - 99.3]	0.08
CLIN47	38	19	5119332	5100727	36	2078183	5118547	60.01	494881	205521	1019707.6	2	9	0.00	Serratia	13	985	293	7	974	4	0	0	0	99.74	0.37	0	-	-								Serratia sarumanii	Serratia sarumanii K-M0706	98	[96.8 - 98.8]	99.9	[99.9 - 100.0]	99.1	[98.5 - 99.5]	0.15
CLIN48	46	26	5115655	5098915	41	1653462	5113556	60.02	347225	88017	715570.4	3	15	0.00	Serratia	13	985	293	7	974	4	0	0	0	99.74	0.37	0	-	-								Serratia sarumanii	Serratia sarumanii K-M0706	98	[96.7 - 98.8]	99.9	[99.9 - 100.0]	99.1	[98.5 - 99.5]	0.15
CLIN49	40	25	5115424	5101130	36	659496	5113721	60.01	318338	109078	342258.8	6	16	0.00	Serratia	13	985	293	7	974	4	0	0	0	99.74	0.37	0	-	-								Serratia sarumanii	Serratia sarumanii K-M0706	98	[96.7 - 98.8]	99.9	[99.9 - 100.0]	99.1	[98.4 - 99.4]	0.15
CLIN52	35	20	5117589	5101653	31	1283613	5115720	60.01	494802	96450	723331.7	3	11	0.00	Serratia	13	985	293	7	974	4	0	0	0	99.74	0.37	0	-	-								Serratia sarumanii	Serratia sarumanii K-M0706	98	[96.8 - 98.8]	99.9	[99.9 - 100.0]	99.1	[98.5 - 99.5]	0.15
CLIN53	38	22	5119601	5101614	36	1562458	5118745	60.00	340705	119725	684469.4	4	12	0.00	Serratia	13	985	293	7	974	4	0	0	0	99.74	0.37	0	-	-								Serratia sarumanii	Serratia sarumanii K-M0706	98	[96.7 - 98.8]	99.9	[99.9 - 100.0]	99.1	[98.4 - 99.4]	0.14
CLIN55	105	42	5405153	5314943	102	598402	5403810	57.35	273053	35262	254177.6	8	27	0.00	Klebsiella	29	1359	348	2	1352	5	0	0	0	99.93	0.52	20	kpneumoniae	17	gapA(2)	infB(1)	mdh(1)	pgi(1)	phoE(4)	rpoB(4)	tonB(4)	Klebsiella quasipneumoniae subsp. Similipneumoniae	Klebsiella quasipneumoniae subsp. similipneumoniae 07A044	82.5	[78.6 - 85.8]	54.6	[51.9 - 57.3]	79.2	[75.8 - 82.2]	0.86
CLIN58	93	46	4943777	4881831	92	582370	4943319	54.99	132490	36637	224626.3	9	32	0.00	Enterobacter	13	1338	370	6	1324	8	0	0	0	99.18	1.07	0	ecloacae	104	dnaA(59)	fusA(40)	gyrB(76)	leuS(9)	pyrG(70)	rplB(6)	rpoB(6)	Enterobacter hormaechei subsp. Hoffmannii	Enterobacter hormaechei subsp. hoffmannii DSM 14563	87.3	[83.7 - 90.1]	91.8	[89.7 - 93.5]	90.7	[88.1 - 92.9]	0.35	E. hoffmannii; GCF_001729745.1	98.8654	1431	1607
CLIN59	67	33	5133306	5091064	64	851368	5132101	60.00	318064	65065	340357.8	6	20	0.00	Serratia	13	985	293	7	969	9	0	0	0	99.74	0.7	0	-	-								Serratia sarumanii	Serratia sarumanii K-M0706	97.8	[96.4 - 98.7]	99.9	[99.9 - 100.0]	99	[98.3 - 99.4]	0.13
CLIN61	115	61	4627846	4535835	114	353528	4627395	54.06	88824	32048	128378.2	15	43	0.00	Citrobacter	8	1566	347	3	1555	8	0	0	0	99.86	0.65	0	cfreundii	690	aspC(219)	clpX(186)	fadD(276)	mdh(222)	arcA(101)	dnaG(211)	lysP(178)	Citrobacter koseri	Citrobacter koseri NCTC 10786	92.8	[90.1 - 94.9]	91.1	[88.9 - 92.9]	94.8	[92.8 - 96.2]	0.25
CLIN62	112	64	4941219	4889390	107	316961	4939203	54.95	131217	27426	134443.4	13	46	0.00	Enterobacter	13	1338	370	6	1323	9	0	0	0	99.18	1.09	0	ecloacae	104	dnaA(59)	fusA(40)	gyrB(76)	leuS(9)	pyrG(70)	rplB(6)	rpoB(6)	Enterobacter hormaechei subsp. Hoffmannii	Enterobacter hormaechei subsp. hoffmannii DSM 14563	87.2	[83.7 - 90.1]	91.9	[89.8 - 93.6]	90.7	[88.0 - 92.8]	0.39	E. hoffmannii; GCF_001729745.1	98.8711	1425	1597
CLIN64	87	44	5021564	4955773	85	630917	5020627	54.87	215621	39847	262862.9	7	27	0.00	Enterobacter	13	1338	370	7	1320	11	0	0	0	99.56	1.74	0	ecloacae	254	dnaA(58)	fusA(4)	gyrB(90)	leuS(6)	pyrG(39)	rplB(4)	rpoB(59)	Enterobacter hormaechei subsp. Steigerwaltii	Enterobacter hormaechei subsp. steigerwaltii DSM 16691	81	[77.0 - 84.3]	91.6	[89.5 - 93.3]	85.7	[82.5 - 88.3]	0.69	E. xiangfangensis; GCF_001729785.1	97.1468	1365	1633
CLIN65	87	47	4947141	4898323	85	582285	4946460	54.97	164902	37829	231898.8	8	30	0.00	Enterobacter	13	1338	370	6	1324	8	0	0	0	99.18	1.07	0	ecloacae	104	dnaA(59)	fusA(40)	gyrB(76)	leuS(9)	pyrG(70)	rplB(6)	rpoB(6)	Enterobacter hormaechei subsp. Hoffmannii	Enterobacter hormaechei subsp. hoffmannii DSM 14563	87.2	[83.7 - 90.1]	91.8	[89.7 - 93.5]	90.7	[88.0 - 92.8]	0.37	E. hoffmannii; GCF_001729745.1	98.8379	1442	1611
CLIN67	50	29	4751580	4730683	46	608023	4750158	55.49	216571	84375	279765.1	7	20	0.00	Enterobacter	13	1338	370	8	1322	8	0	0	0	99.29	1.29	0	ecloacae	536	dnaA(6)	fusA(4)	gyrB(4)	leuS(6)	pyrG(37)	rplB(4)	rpoB(6)	Enterobacter hormaechei subsp. Steigerwaltii	Enterobacter hormaechei subsp. steigerwaltii DSM 16691	88.2	[84.7 - 90.9]	91.6	[89.5 - 93.4]	91.4	[88.8 - 93.4]	0.06	E. xiangfangensis; GCF_001729785.1	97.0831	1388	1564
CLIN68	76	53	4808386	4775181	75	441818	4807925	50.84	143866	33092	185054.9	9	34	0.00	Escherichia	27	1212	320	3	1205	4	0	0	0	99.64	0.33	0	ecoli	1850	adk(6)	fumC(65)	gyrB(225)	icd(140)	mdh(9)	purA(1)	recA(165)	Shigella sonnei	Shigella sonnei ATCC 29930	74.9	[70.9 - 78.5]	84.3	[81.6 - 86.8]	79.3	[75.8 - 82.3]	0.17
CLIN69	111	36	5625578	5501474	106	608805	5623466	57.01	328275	41084	305640.6	7	23	0.00	Klebsiella	29	1359	348	1	1351	7	0	0	0	99.99	0.57	0	kpneumoniae	20	gapA(2)	infB(3)	mdh(1)	pgi(1)	phoE(4)	rpoB(4)	tonB(4)	Klebsiella quasipneumoniae subsp. Similipneumoniae	Klebsiella quasipneumoniae subsp. similipneumoniae 07A044	79.8	[75.9 - 83.3]	54.8	[52.0 - 57.5]	77	[73.5 - 80.1]	1.2
CLIN71	127	52	5210576	5087048	125	658384	5209938	54.93	173024	26071	228770.5	9	37	0.00	Enterobacter	13	1338	370	7	1317	11	2	1	0	99.36	2.22	0	ecloacae	88	dnaA(4)	fusA(4)	gyrB(4)	leuS(62)	pyrG(59)	rplB(4)	rpoB(6)	Enterobacter hormaechei subsp. Steigerwaltii	Enterobacter hormaechei subsp. steigerwaltii DSM 16691	80.2	[76.2 - 83.6]	91.5	[89.4 - 93.3]	85	[81.8 - 87.7]	0.63	E. xiangfangensis; GCF_001729785.1	97.1725	1385	1672
CLIN72	103	49	5047000	4966712	101	607445	5046113	55.10	164194	40454	232406.6	8	32	0.00	Enterobacter	13	1338	370	8	1319	11	0	0	0	99.29	1.46	0	ecloacae	536	dnaA(6)	fusA(4)	gyrB(4)	leuS(6)	pyrG(37)	rplB(4)	rpoB(6)	Enterobacter hormaechei subsp. Steigerwaltii	Enterobacter hormaechei subsp. steigerwaltii DSM 16691	82.8	[79.0 - 86.1]	91.6	[89.5 - 93.4]	87.2	[84.2 - 89.7]	0.45	E. xiangfangensis; GCF_001729785.1	97.112	1385	1634
CLIN73	101	43	5255125	5155283	95	1208531	5252561	54.77	315265	32379	452879.5	5	26	0.00	Enterobacter	13	1338	370	7	1316	12	1	2	0	99.36	2.54	3.7	ecloacae	88	dnaA(4)	fusA(4)	gyrB(4)	leuS(62)	pyrG(59)	rplB(4)	rpoB(6)	Enterobacter hormaechei subsp. Steigerwaltii	Enterobacter hormaechei subsp. steigerwaltii DSM 16691	79.3	[75.4 - 82.8]	91.6	[89.4 - 93.3]	84.3	[81.1 - 87.1]	0.78	E. xiangfangensis; GCF_001729785.1	97.1272	1394	1705
CLIN74	33	19	5213058	5194916	32	1866742	5212702	59.94	399368	131229	865612.8	3	11	0.00	Serratia	13	985	293	4	976	5	0	0	0	99.88	0.54	0	-	-								Serratia sarumanii	Serratia sarumanii K-M0706	91.6	[88.6 - 93.9]	90	[87.7 - 91.9]	93.8	[91.6 - 95.4]	0.08
CLIN75	156	77	5082983	4951814	155	243161	5082553	51.83	98475	19853	107295.7	17	60	0.00	Citrobacter	8	1566	347	1	1553	11	1	0	0	99.97	0.8	14.29	cfreundii	98	aspC(54)	clpX(55)	fadD(60)	mdh(52)	arcA(7)	dnaG(6)	lysP(11)	Citrobacter freundii	Citrobacter freundii NBRC 12681	81.9	[78.1 - 85.3]	88.1	[85.6 - 90.2]	85.9	[82.8 - 88.5]	0.17
CLIN76	149	80	5102120	4997793	144	289362	5100050	51.75	83999	25955	101849.4	19	59	0.00	Citrobacter	8	1566	347	1	1552	12	1	0	0	99.97	0.86	13.33	cfreundii	98	aspC(54)	clpX(55)	fadD(60)	mdh(52)	arcA(7)	dnaG(6)	lysP(11)	Citrobacter freundii	Citrobacter freundii NBRC 12681	81.8	[77.9 - 85.1]	88.1	[85.6 - 90.2]	85.8	[82.6 - 88.4]	0.09
CLIN77	86	42	4975781	4920431	77	624628	4972173	55.17	184514	57376	245666.7	8	26	0.00	Enterobacter	13	1338	370	7	1325	6	0	0	0	99.36	0.97	0	ecloacae	66	dnaA(52)	fusA(21)	gyrB(20)	leuS(44)	pyrG(45)	rplB(4)	rpoB(6)	Enterobacter hormaechei subsp. Xiangfangensis	Enterobacter hormaechei subsp. xiangfangensis LMG 27195	89.6	[86.3 - 92.1]	93.7	[91.8 - 95.1]	92.7	[90.4 - 94.6]	0.11	E. xiangfangensis; GCF_001729785.1	99.0595	1463	1624
CLIN78	121	41	4950747	4841680	119	630899	4949810	55.16	209010	47079	257031.2	8	28	0.00	Enterobacter	13	1338	370	8	1320	10	0	0	0	99.47	1.7	0	ecloacae	254	dnaA(58)	fusA(4)	gyrB(90)	leuS(6)	pyrG(39)	rplB(4)	rpoB(59)	Enterobacter hormaechei subsp. Steigerwaltii	Enterobacter hormaechei subsp. steigerwaltii DSM 16691	83.2	[79.4 - 86.5]	91.1	[88.9 - 92.9]	87.4	[84.4 - 89.9]	0.39	E. xiangfangensis; GCF_001729785.1	97.0709	1367	1592
CLIN80	83	44	4929839	4890931	80	452946	4928727	54.89	161932	47093	191682.4	10	30	0.00	Enterobacter	13	1338	370	2	1331	5	0	0	0	99.88	0.71	0	ecloacae	125	dnaA(63)	fusA(3)	gyrB(66)	leuS(68)	pyrG(3)	rplB(16)	rpoB(3)	Enterobacter kobei	Enterobacter kobei DSM 13645	83.3	[79.5 - 86.5]	92.7	[90.8 - 94.3]	87.7	[84.7 - 90.2]	0.01	E. kobei; GCF_001729765.1	98.8625	1422	1603
CLIN81	196	80	5671383	5471298	191	374161	5669140	57.11	90693	18225	122006.9	18	66	0.00	Klebsiella	29	1359	348	3	1348	8	0	0	0	99.9	0.67	12.5	kpneumoniae	307	gapA(4)	infB(1)	mdh(2)	pgi(52)	phoE(1)	rpoB(1)	tonB(7)	Klebsiella africana	Klebsiella africana SB5857	82	[78.1 - 85.3]	61.1	[58.3 - 63.9]	80.6	[77.2 - 83.6]	0.24
CLIN82	249	104	4786378	4545862	242	172090	4783705	52.22	53635	8861	64914.6	26	107	0.00	Citrobacter	8	1566	347	5	1554	6	1	0	0	99.77	0.61	0	cfreundii	98	aspC(54)	clpX(55)	fadD(60)	mdh(52)	arcA(7)	dnaG(6)	lysP(11)	Citrobacter freundii	Citrobacter freundii NBRC 12681	85.1	[81.3 - 88.2]	88.4	[85.9 - 90.5]	88.5	[85.6 - 90.9]	0.56
CLIN83	118	44	4985494	4876636	114	604783	4983866	55.27	200700	40051	242541.5	7	30	0.00	Enterobacter	13	1338	370	8	1319	11	0	0	0	99.29	1.46	0	ecloacae	536	dnaA(6)	fusA(4)	gyrB(4)	leuS(6)	pyrG(37)	rplB(4)	rpoB(6)	Enterobacter hormaechei subsp. Steigerwaltii	Enterobacter hormaechei subsp. steigerwaltii DSM 16691	83.9	[80.1 - 87.1]	91.6	[89.5 - 93.3]	88.1	[85.1 - 90.5]	0.29	E. xiangfangensis; GCF_001729785.1	97.0918	1391	1613
CLIN84	161	77	5534844	5419098	155	243178	5532496	59.08	109896	19975	113250.4	17	60	0.00	Serratia	13	985	293	3	969	12	1	0	0	99.92	1.71	6.67	-	-								Serratia montpellierensis	Serratia montpellierensis PsyLou2A	74.6	[70.6 - 78.2]	68.4	[65.4 - 71.2]	76	[72.6 - 79.2]	0.49
CLIN86	168	83	5528588	5395254	166	242165	5527707	59.11	85653	18378	102571.0	20	66	0.00	Serratia	13	985	293	3	969	12	1	0	0	99.92	1.71	6.67	-	-								Serratia montpellierensis	Serratia montpellierensis PsyLou2A	74.8	[70.8 - 78.4]	68.3	[65.3 - 71.2]	76.2	[72.7 - 79.3]	0.47
CLIN87	147	75	5549107	5446513	144	268982	5547886	59.04	96807	25142	106862.7	19	57	0.00	Serratia	13	985	293	3	969	12	1	0	0	99.92	1.71	6.67	-	-								Serratia montpellierensis	Serratia montpellierensis PsyLou2A	74.5	[70.5 - 78.1]	68.3	[65.4 - 71.2]	75.9	[72.5 - 79.1]	0.54
CLIN88	82	45	5110704	5066283	81	476409	5110281	55.45	223140	46220	219576.1	8	32	0.00	Enterobacter	13	1338	370	3	1329	5	1	0	0	99.61	1.21	0	ecloacae	250	dnaA(84)	fusA(62)	gyrB(95)	leuS(98)	pyrG(94)	rplB(43)	rpoB(52)	Enterobacter vonholyi	Enterobacter vonholyi E13T	78.4	[74.4 - 81.9]	56.6	[53.8 - 59.3]	76.4	[72.9 - 79.5]	0.13	E. asburiae; GCF_001521715	98.3796	1392	1669
CLIN89	153	78	5551577	5446083	150	439099	5550288	59.04	109383	21535	131587.7	17	58	0.00	Serratia	13	985	293	3	969	12	1	0	0	99.92	1.71	6.67	-	-								Serratia montpellierensis	Serratia montpellierensis PsyLou2A	74.4	[70.4 - 78.0]	68.4	[65.4 - 71.2]	75.9	[72.4 - 79.0]	0.54
CLIN90	204	86	5684170	5489213	199	373690	5681793	57.08	91415	16255	106809.8	20	73	0.00	Klebsiella	29	1359	348	2	1349	8	0	0	0	99.94	0.67	12.5	kpneumoniae	307	gapA(4)	infB(1)	mdh(2)	pgi(52)	phoE(1)	rpoB(1)	tonB(7)	Klebsiella africana	Klebsiella africana SB5857	82	[78.1 - 85.3]	61.1	[58.3 - 63.9]	80.6	[77.2 - 83.6]	0.24
CLIN91	118	44	4949298	4848157	113	630695	4947061	55.15	168255	38307	242771.9	9	30	0.00	Enterobacter	13	1338	370	7	1321	10	0	0	0	99.56	1.7	0	ecloacae	254	dnaA(58)	fusA(4)	gyrB(90)	leuS(6)	pyrG(39)	rplB(4)	rpoB(59)	Enterobacter hormaechei subsp. Steigerwaltii	Enterobacter hormaechei subsp. steigerwaltii DSM 16691	83.2	[79.4 - 86.5]	91.1	[88.9 - 92.9]	87.4	[84.4 - 89.9]	0.4	E. xiangfangensis; GCF_001729785.1	97.1058	1360	1590
CLIN92	109	36	5512839	5403108	107	522067	5511978	57.58	302347	56312	280025.1	8	22	0.00	Klebsiella	29	1359	348	2	1347	7	3	0	0	99.7	0.66	0	kpneumoniae	3449	gapA(18)	infB(22)	mdh(245)	pgi(64)	phoE(11)	rpoB(38)	tonB(51)	Klebsiella quasipneumoniae subsp. Similipneumoniae	Klebsiella quasipneumoniae subsp. similipneumoniae 07A044	87.6	[84.0 - 90.4]	93.5	[91.7 - 95.0]	91.2	[88.6 - 93.3]	0.63
CLIN93	289	110	6398475	6152665	268	203657	6390201	55.83	74404	16089	75528.4	31	96	0.00	Klebsiella	29	1359	348	2	1349	8	0	0	0	99.85	0.84	0	koxytoca	108	gapA(3)	infB(5)	mdh(21)	pgi(20)	phoE(24)	rpoB(6)	tonB(30)	Klebsiella michiganensis	Klebsiella michiganensis DSM 25444	83.4	[79.6 - 86.6]	88.5	[86.0 - 90.6]	87.1	[84.1 - 89.7]	0.14
CLIN94	65	34	5610485	5564567	61	602921	5608638	57.21	369984	72887	342306.9	6	19	0.00	Klebsiella	29	1359	348	2	1354	3	0	0	0	99.9	0.35	0	kpneumoniae	16	gapA(2)	infB(1)	mdh(2)	pgi(1)	phoE(4)	rpoB(4)	tonB(4)	Klebsiella quasipneumoniae subsp. Similipneumoniae	Klebsiella quasipneumoniae subsp. similipneumoniae 07A044	80.6	[76.7 - 84.0]	54.6	[51.9 - 57.3]	77.6	[74.1 - 80.7]	0.99
CLIN95	153	60	5408291	5240291	151	347675	5407410	57.81	140207	33020	156991.9	12	42	0.00	Klebsiella	29	1359	348	2	1346	11	0	0	0	99.7	0.66	0	kpneumoniae	3449	gapA(18)	infB(22)	mdh(245)	pgi(64)	phoE(11)	rpoB(38)	tonB(51)	Klebsiella variicola	Klebsiella variicola DSM 15968	80.9	[77.0 - 84.3]	53.2	[50.5 - 55.8]	77.4	[74.0 - 80.5]	0.25
CLIN96	90	47	4906864	4849820	88	313259	4906047	54.93	157819	41003	167854.4	11	33	0.00	Enterobacter	13	1338	370	2	1331	5	0	0	0	99.88	0.71	0	ecloacae	125	dnaA(63)	fusA(3)	gyrB(66)	leuS(68)	pyrG(3)	rplB(16)	rpoB(3)	Enterobacter kobei	Enterobacter kobei DSM 13645	83.3	[79.4 - 86.5]	92.9	[91.0 - 94.5]	87.7	[84.7 - 90.2]	0.03	E. kobei; GCF_001729765.1	98.8868	1419	1596
CLIN97	78	34	5521108	5455568	76	677543	5520217	57.52	325825	48115	363205.4	6	18	0.00	Klebsiella	29	1359	348	2	1347	7	3	0	0	99.7	0.66	0	kpneumoniae	3449	gapA(18)	infB(22)	mdh(245)	pgi(64)	phoE(11)	rpoB(38)	tonB(51)	Klebsiella quasipneumoniae subsp. Similipneumoniae	Klebsiella quasipneumoniae subsp. similipneumoniae 07A044	87.5	[84.0 - 90.3]	93.5	[91.7 - 95.0]	91.2	[88.5 - 93.2]	0.69
CLIN99	73	42	5260353	5217470	66	621482	5257379	55.57	194849	55314	245030.6	9	28	3.80	Enterobacter	13	1338	370	7	1326	3	2	0	0	98.67	0.93	0	ecloacae	1065	dnaA(305)	fusA(106)	gyrB(330)	leuS(367)	pyrG(298)	rplB(138)	rpoB(18)	Enterobacter rongchengensis	Enterobacter rongchengensis 170250	74.9	[70.9 - 78.5]	90.2	[87.9 - 92.1]	80.2	[76.8 - 83.2]	0.62	E. Genomospecies_4; GCF_000958285.1	98.6897	1438	1722
CLINX	77	44	4908676	4879807	74	453079	4907379	54.92	161888	40959	196994.6	9	31	0.00	Enterobacter	13	1338	370	2	1331	5	0	0	0	99.88	0.71	0	ecloacae	125	dnaA(63)	fusA(3)	gyrB(66)	leuS(68)	pyrG(3)	rplB(16)	rpoB(3)	Enterobacter kobei	Enterobacter kobei DSM 13645	83.2	[79.4 - 86.4]	92.9	[90.9 - 94.4]	87.7	[84.7 - 90.2]	0.01	E. kobei; GCF_001729765.1	98.8536	1424	1602
[truncated: 115 more columns]
