# Supplementary material for: Decade of Carbapenemase-Producing Enterobacterales in New Caledonia: Integrative Surveillance Though Genomic, Phenotypic and Clinical approaches
Source: Research Square preprint supplement (doi:10.21203/rs.3.rs-5067243/v1), 2024-12-09
Supplement: Supplementary file 2 [file ae7ed0b7d49d16e24bfe7abe.docx]

**Supplementary Table 2: Single-nucleotide polymorphism difference count matrix among major sequence type groups**

This analysis was conducted for each sequence type (ST) that was isolated at least twice in the whole-genome sequencing collection (except Serratia). For each group, an external reference sequence was initially identified as sufficiently similar using the Similar Genome Finder interface available in the BV-BRC resource center. This reference was then used to map and extract the core genome of each associated group with Snippy software. Recombination elements were subsequently removed using ClonalFrameML, following a maximum likelihood phylogenetic reconstruction performed by IQ-Tree. Finally, the reduced alignment was transformed into a single-nucleotide polymorphisms (SNPs) distance matrix using snp-dists software.

| **Local ST group** | **Local query** | **Reference strain selected** | **Assembly accession** | **Sequencing status** | **Contigs** | **Genome length** | **Distance** | **Counts** |
| --- | --- | --- | --- | --- | --- | --- | --- | --- |
| *Citrobacter* ST98 | CLIN103 | UMH13 | GCA_003665635.1 | Complete | 1 | 4917351 | 0.00430121 | 841/1000 |
| *Enterobacter* ST254 | CLIN119 | S5 | GCA_003408575.1 | Complete | 3 | 5114406 | 0.00680395 | 765/1000 |
| *Enterobacter* ST88 | CLIN73 | AR_0163 | GCA_002192355.1 | Complete | 2 | 5215817 | 0.00439372 | 838/1000 |
| *Enterobacter* ST104 | CLIN33 | 4928STDY7387746 | GCA_902166715.1 | Complete | 1 | 5332468 | 0.00274254 | 894/1000 |
| *Enterobacter* ST125 | CLIN80 | C210313 | GCA_023749965.1 | WGS | 55 | 4769145 | 0.00420918 | 844/1000 |
| *Enterobacter* ST536 | CLIN67 | UBA1352 | GCA_002306215.1 | WGS | 32 | 4625944 | 0.00467416 | 829/1000 |
| *Klebsiella* ST3449 | CLIN97 | S009 | GCA_003065045.1 | WGS | 114 | 5234006 | 0.00564181 | 799/1000 |
| *Klebsiella* ST307 | CLIN120 | KP_NORM_BLD_2012_85054 | GCA_019797985.1 | Complete | 3 | 5531852 | 0.00175922 | 930/1000 |
| *Klebsiella* ST20 | CLIN69 | NFYY0065 | GCA_004137665.1 | Complete | 1 | 5235159 | 0.00486359 | 823/1000 |
| *Klebsiella* ST16 | CLIN31 | DA33141 | GCA_003181095.1 | Complete | 3 | 5477813 | 0.00175922 | 930/1000 |
| *Serratia* GRPI | CLIN115 | gn2473 | GCA_001539225.1 | WGS | 24 | 5156629 | 0.0118017 | 640/1000 |
| *Serratia* GRPII | CLIN06 | ICU1-2a | GCA_001594385.1 | WGS | 20 | 5115171 | 0.00734051 | 750/1000 |
| *Serratia* GRPIII | CLIN46 | UMH9 | GCA_002220555.1 | Complete | 1 | 5024591 | 0.00103256 | 958/1000 |

**Reference assemblies selected using the Similar Genome Finder interface (request August 2023)**

***Citrobacter* ST98 group**

|  | **CLIN05** | **CLIN101** | **CLIN102** | **CLIN103** | **CLIN104** | **CLIN32** | **CLIN75** | **CLIN76** | **CLIN82** |
| --- | --- | --- | --- | --- | --- | --- | --- | --- | --- |
| **CLIN05** |  | 24 | 21 | 27 | 28 | 23 | 19 | 23 | 28 |
| **CLIN101** | 24 |  | 19 | 9 | 10 | 21 | 9 | 13 | 28 |
| **CLIN102** | 21 | 19 |  | 22 | 23 | 8 | 16 | 20 | 15 |
| **CLIN103** | 27 | 9 | 22 |  | 1 | 24 | 12 | 16 | 31 |
| **CLIN104** | 28 | 10 | 23 | 1 |  | 25 | 13 | 17 | 32 |
| **CLIN32** | 23 | 21 | 8 | 24 | 25 |  | 18 | 22 | 15 |
| **CLIN75** | 19 | 9 | 16 | 12 | 13 | 18 |  | 8 | 23 |
| **CLIN76** | 23 | 13 | 20 | 16 | 17 | 22 | 8 |  | 27 |
| **CLIN82** | 28 | 28 | 15 | 31 | 32 | 15 | 23 | 27 |  |

***Enterobacter* ST254 group**

|  | **CLIN119** | **CLIN124** | **CLIN64** | **CLIN78** | **CLIN91** |
| --- | --- | --- | --- | --- | --- |
| **CLIN119** |  | 17 | 24 | 36 | 32 |
| **CLIN124** | 17 |  | 25 | 29 | 25 |
| **CLIN64** | 24 | 25 |  | 26 | 26 |
| **CLIN78** | 36 | 29 | 26 |  | 28 |
| **CLIN91** | 32 | 25 | 26 | 28 |  |

***Enterobacter* ST88 group**

|  | **CLIN71** | **CLIN73** |
| --- | --- | --- |
| **CLIN71** |  | 24 |
| **CLIN73** | 24 |  |

***Enterobacter* ST104 group**

|  | **CLIN28** | **CLIN29** | **CLIN30** | **CLIN33** | **CLIN34** | **CLIN37** | **CLIN58** | **CLIN62** | **CLIN65** |
| --- | --- | --- | --- | --- | --- | --- | --- | --- | --- |
| **CLIN28** |  | 24 | 30 | 24 | 31 | 26 | 22 | 28 | 23 |
| **CLIN29** | 24 |  | 30 | 24 | 28 | 22 | 20 | 24 | 19 |
| **CLIN30** | 30 | 30 |  | 23 | 31 | 30 | 26 | 32 | 27 |
| **CLIN33** | 24 | 24 | 23 |  | 26 | 22 | 20 | 22 | 17 |
| **CLIN34** | 31 | 28 | 31 | 26 |  | 23 | 29 | 33 | 28 |
| **CLIN37** | 26 | 22 | 30 | 22 | 23 |  | 18 | 22 | 17 |
| **CLIN58** | 22 | 20 | 26 | 20 | 29 | 18 |  | 16 | 11 |
| **CLIN62** | 28 | 24 | 32 | 22 | 33 | 22 | 16 |  | 11 |
| **CLIN65** | 23 | 19 | 27 | 17 | 28 | 17 | 11 | 11 |  |

|  | **CLIN80** | **CLIN96** | **CLINX** |
| --- | --- | --- | --- |
| **CLIN80** |  | 21 | 19 |
| **CLIN96** | 21 |  | 22 |
| **CLINX** | 19 | 22 |  |

***Enterobacter* ST125 group**

***Enterobacter* ST536 group**

|  | **CLIN67** | **CLIN70** | **CLIN72** | **CLIN83** |
| --- | --- | --- | --- | --- |
| **CLIN67** |  | 13 | 26 | 25 |
| **CLIN70** | 13 |  | 17 | 14 |
| **CLIN72** | 26 | 17 |  | 23 |
| **CLIN83** | 25 | 14 | 23 |  |

***Klebsiella* ST3449 group**

|  | **CLIN92** | **CLIN95** | **CLIN97** |
| --- | --- | --- | --- |
| **CLIN92** |  | 32 | 31 |
| **CLIN95** | 32 |  | 33 |
| **CLIN97** | 31 | 33 |  |

***Klebsiella* ST307 group**

|  | **CLIN120** | **CLIN81** | **CLIN90** |
| --- | --- | --- | --- |
| **CLIN120** |  | 36 | 33 |
| **CLIN81** | 36 |  | 27 |
| **CLIN90** | 33 | 27 |  |

***Klebsiella* ST20 group**

|  | **CLIN04** | **CLIN09** | **CLIN69** |
| --- | --- | --- | --- |
| **CLIN04** |  | 81 | 78 |
| **CLIN09** | 81 |  | 84 |
| **CLIN69** | 78 | 84 |  |

***Klebsiella* ST16 group**

|  | **CLIN02** | **CLIN03** | **CLIN31** | **CLIN35** | **CLIN94** |
| --- | --- | --- | --- | --- | --- |
| **CLIN02** |  | 25 | 26 | 27 | 26 |
| **CLIN03** | 25 |  | 35 | 36 | 31 |
| **CLIN31** | 26 | 35 |  | 23 | 26 |
| **CLIN35** | 27 | 36 | 23 |  | 21 |
| **CLIN94** | 26 | 31 | 26 | 21 |  |

***Serratia* group I**

|  | **CLIN115** | **CLIN122** |
| --- | --- | --- |
| **CLIN115** |  | 10 |
| **CLIN122** | 10 |  |

***Serratia* group II**

|  | **CLIN06** | **CLIN08** | **CLIN84** | **CLIN86** | **CLIN87** | **CLIN89** |
| --- | --- | --- | --- | --- | --- | --- |
| **CLIN06** |  | 26 | 25 | 34 | 29 | 27 |
| **CLIN08** | 26 |  | 31 | 36 | 27 | 29 |
| **CLIN84** | 25 | 31 |  | 15 | 10 | 28 |
| **CLIN86** | 34 | 36 | 15 |  | 17 | 35 |
| **CLIN87** | 29 | 27 | 10 | 17 |  | 24 |
| **CLIN89** | 27 | 29 | 28 | 35 | 24 |  |

***Serratia* group III**

|  | **CLIN39** | **CLIN44** | **CLIN45** | **CLIN46** | **CLIN47** | **CLIN48** | **CLIN49** | **CLIN52** | **CLIN53** | **CLIN59** | **CLIN74** |
| --- | --- | --- | --- | --- | --- | --- | --- | --- | --- | --- | --- |
| **CLIN39** |  | 17 | 32 | 17 | 16 | 17 | 19 | 16 | 25 | 21 | 37 |
| **CLIN44** | 17 |  | 29 | 16 | 17 | 18 | 20 | 17 | 24 | 18 | 38 |
| **CLIN45** | 32 | 29 |  | 31 | 32 | 31 | 25 | 32 | 33 | 33 | 53 |
| **CLIN46** | 17 | 16 | 31 |  | 5 | 6 | 10 | 5 | 12 | 10 | 26 |
| **CLIN47** | 16 | 17 | 32 | 5 |  | 5 | 9 | 4 | 13 | 11 | 25 |
| **CLIN48** | 17 | 18 | 31 | 6 | 5 |  | 10 | 1 | 10 | 12 | 26 |
| **CLIN49** | 19 | 20 | 25 | 10 | 9 | 10 |  | 9 | 14 | 14 | 30 |
| **CLIN52** | 16 | 17 | 32 | 5 | 4 | 1 | 9 |  | 9 | 11 | 25 |
| **CLIN53** | 25 | 24 | 33 | 12 | 13 | 10 | 14 | 9 |  | 18 | 34 |
| **CLIN59** | 21 | 18 | 33 | 10 | 11 | 12 | 14 | 11 | 18 |  | 32 |
| **CLIN74** | 37 | 38 | 53 | 26 | 25 | 26 | 30 | 25 | 34 | 32 |  |
